# Supplementary material for: A possible path to persistent re-entry waves at the outlet of the left pulmonary vein
Source: PubMed Central journal article supplement (PMC11266599; doi:10.1038/s41540-024-00406-9), 2024-07-23
Supplement: 41540_2024_406_MOESM1_ESM.pdf [file 41540_2024_406_MOESM1_ESM.pdf]

Supplementary Information for  
*A possible path to persistent re-entry waves  
at the outlet of the left pulmonary vein*

**Supplementary Note 1:  
Properties of the LA and PV membrane mod-  
els with a fixed number of channels**

In this supplementary note, we investigate some properties of the left atrial (LA) and pulmonary vein (PV) cardiomyocyte membrane models described in Supplementary Note 5. We consider the version of the models without protein regulation (i.e., with the number of calcium channels fixed at  $n = 1$ ).

**Effect of rapid pacing on the cytosolic calcium concen-  
tration**

In Supplementary Figure 1, we investigate the effect of the pacing frequency on the average cytosolic calcium concentration between each stimulation. We consider pacing frequencies ranging from the default 1 beats per second (bps) up to 10 bps. We observe that after a few minutes of rapid pacing, the cytosolic calcium concentration increases and that the increase in calcium concentration is larger for a higher pacing frequency.

**Effect of adjusting currents on the cytosolic calcium  
concentration**

In Supplementary Figure 2, we report the percent change in the average cytosolic calcium concentration resulting from a 20% increase in each type of ion channel, pump and exchanger in the cell membrane for the LA and PV membrane models without protein regulation. We observe that increasing

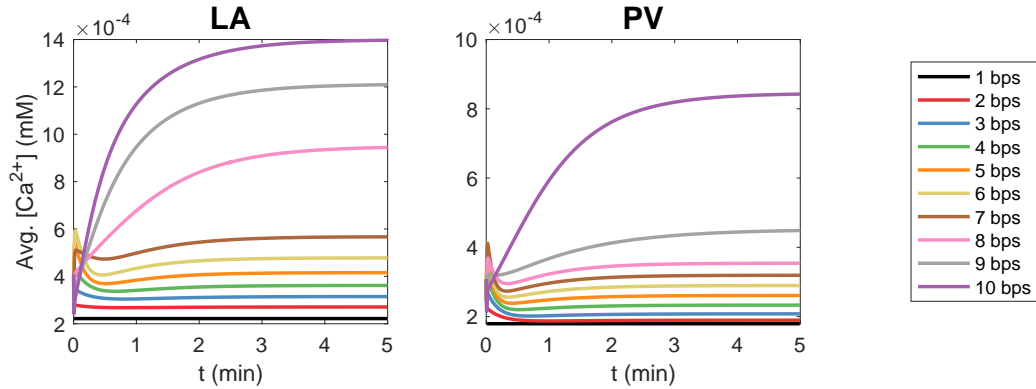

**Supplementary Figure 1: Effect of rapid pacing on the intracellular calcium concentration in the PV and LA membrane models without protein regulation.** The figure shows the time evolution of the average cytosolic calcium concentration as a function of time for pacing frequencies ranging from 1 beat per second (bps) to 10 bps.

the number of channels responsible for the fast sodium current ( $I_{Na}$ ), the late sodium current ( $I_{NaL}$ ) or the background sodium current slightly increases the intracellular calcium concentration. Furthermore, increasing the channels responsible for the L-type calcium current ( $I_{CaL}$ ) or the background calcium current ( $I_{bCa}$ ) results in a considerable increase in the intracellular calcium concentration. On the other hand, increasing the number calcium pumps ( $I_{pCa}$ ), sodium-calcium exchangers ( $I_{NaCa}$ ), sodium-potassium pumps ( $I_{NaK}$ ), background chloride channels ( $I_{bCl}$ ), or  $I_{Kr}$ ,  $I_{Ks}$ ,  $I_{to}$ , or  $I_{Kur}$  potassium channels, causes an decrease in the cytosolic calcium concentration. The effect of increasing the number of  $I_{K1}$  and  $I_f$  channels on the cytosolic calcium concentration is small, and differs between the PV and LA versions of the model.

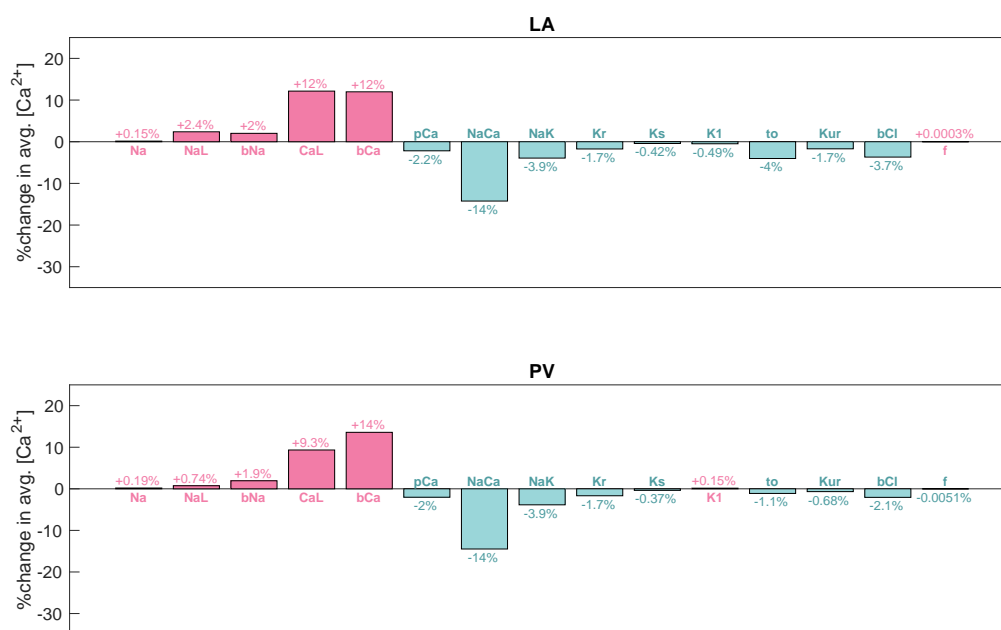

**Supplementary Figure 2: Effect on the intracellular calcium concentration of increasing the number of different types of membrane proteins.** For the LA and PV membrane models without protein regulation, we report the percent change in the average cytosolic calcium concentration resulting from a 20% increase in each type of ion channel, pump and exchanger in the cell membrane. The concentrations are recorded 1 h after the parameter change was applied.

## Supplementary Note 2: Effect of rapid pacing on all currents

In Supplementary Figure 3, we show the baseline LA membrane currents during an action potential in addition to the membrane currents following 1 hour and 72 hours of 10 beats per second rapid pacing. In these simulations, the number of L-type calcium channels are regulated by the cytosolic calcium concentration (see Figure 4 in the paper). In Supplementary Figure 4 we show the same results for the PV case.

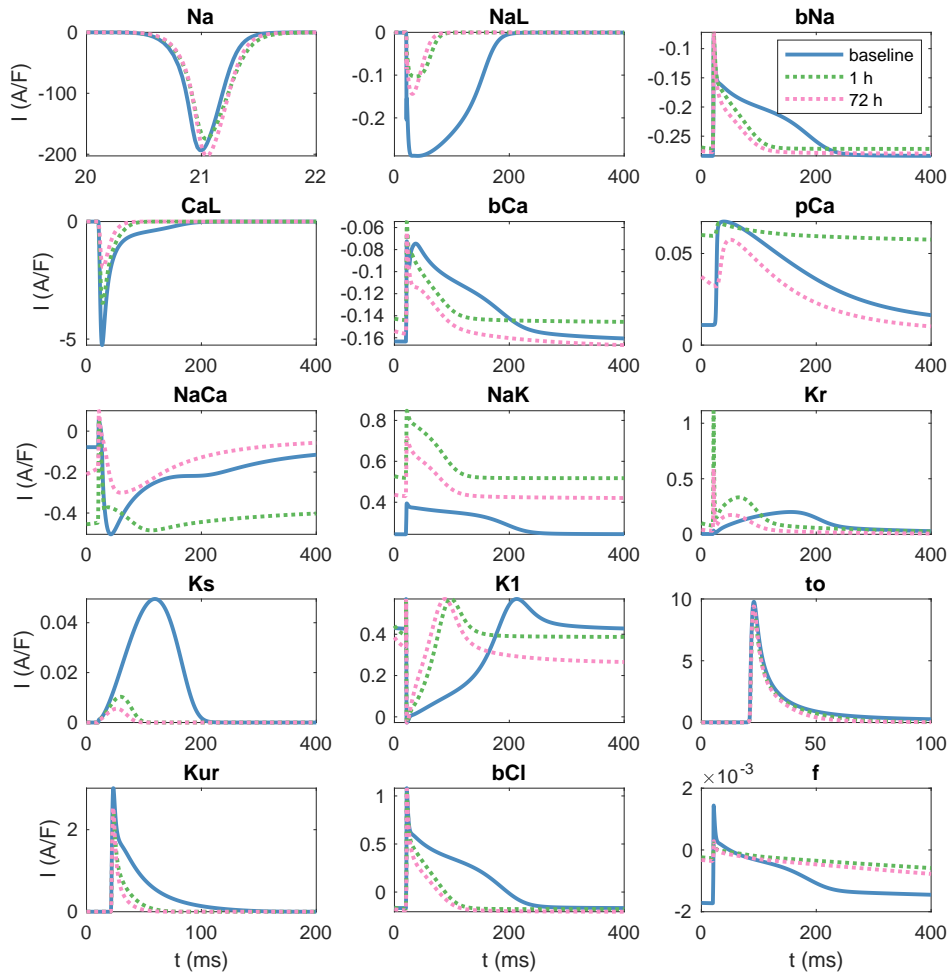

**Supplementary Figure 3: Effect of rapid pacing and L-type calcium channel regulation on all the membrane currents during an LA action potential.** We consider 10 bps pacing and record the currents after 1 hour and 72 hours.

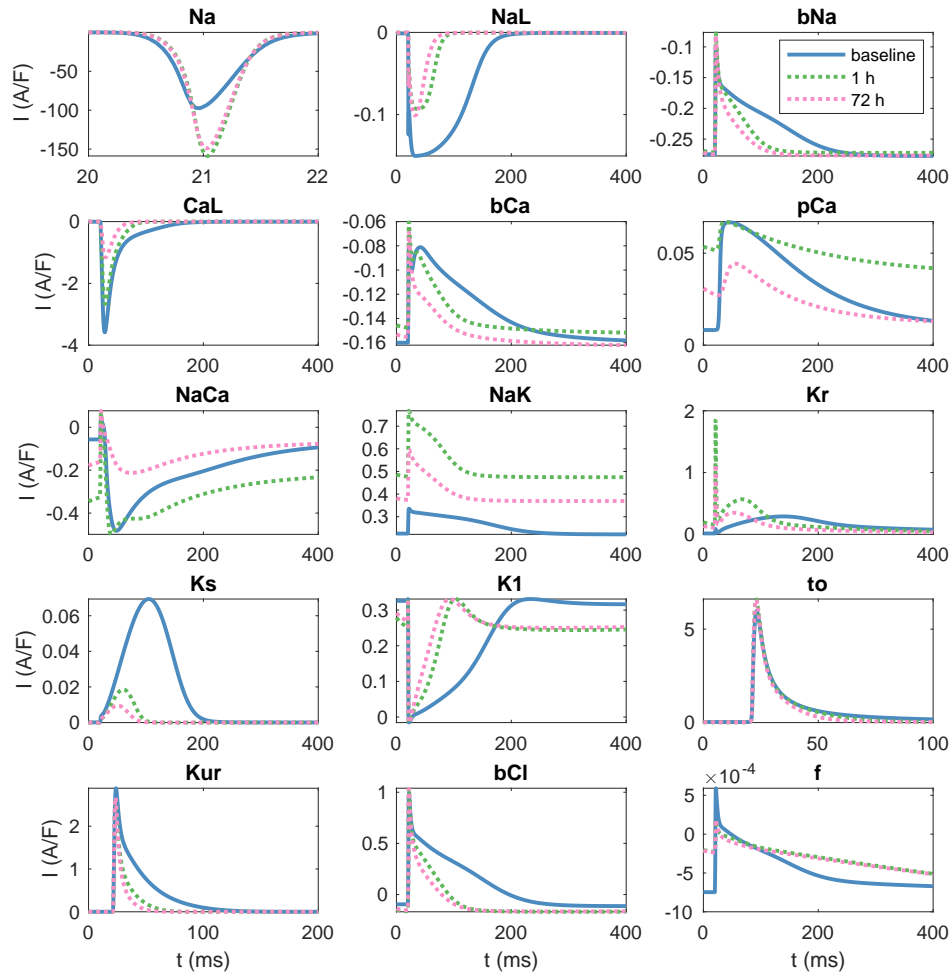

**Supplementary Figure 4: Effect of rapid pacing and L-type calcium channel regulation on all the membrane currents during a PV action potential.** We consider 10 bps pacing and record the currents after 1 hour and 72 hours.

## Supplementary Note 3: Comparison of KNM and SKNM solutions

Supplementary Figure 5 shows a comparison of the solutions of the Kirchhoff network model (KNM) and the simplified Kirchhoff network model (SKNM) [1, 2].

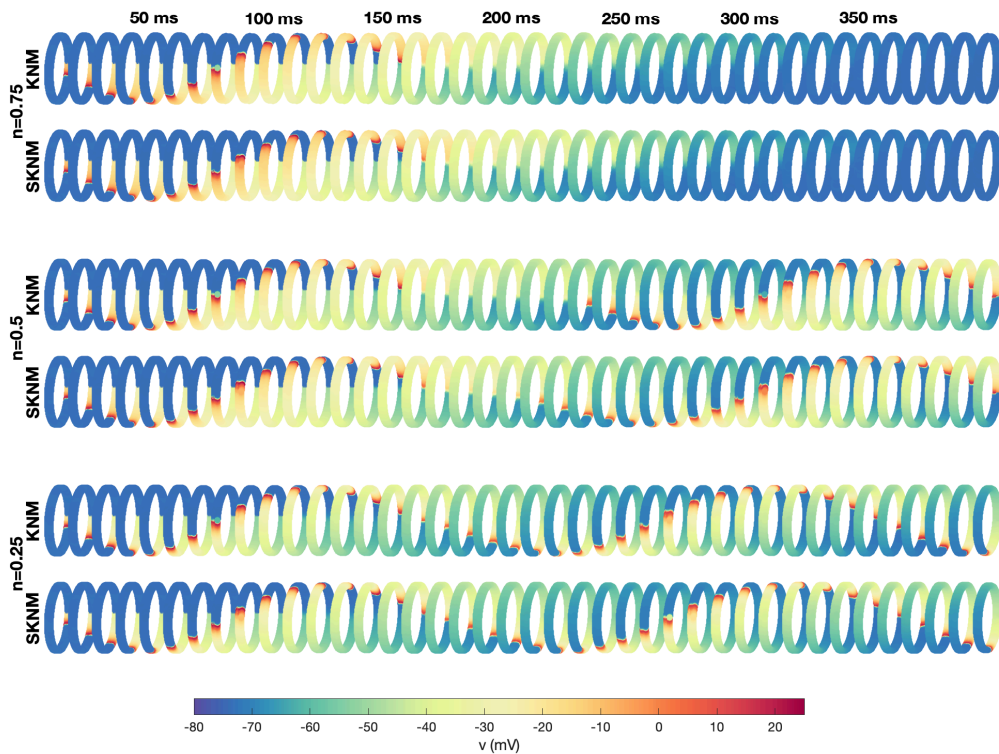

**Supplementary Figure 5: Comparison of KNM and SKNM solutions.** The figure shows the membrane potential for the cells in the PV sleeve cylinder at some different points in time after a stimulation is applied for some KNM and SKNM simulations of  $n = 0.75$ ,  $n = 0.5$  and  $n = 0.25$ . We observe that the two models produce quite similar solutions, but that the conduction velocity does not seem to be entirely identical for the two models.

## Supplementary Note 4: Membrane model formulation

In this supplementary note, we describe the formulation of the human left atrial (LA) and pulmonary vein (PV) cardiomyocyte versions of our membrane model. Here, the membrane potential ( $v$ ) is given in units of mV, and the  $\text{Ca}^{2+}$  and  $\text{Na}^+$  concentrations are given in units of mM. All currents are given in units of A/F, and the ionic fluxes are expressed as mmol/ms per total cell volume (i.e., in units of mM/ms). Time is given in ms. The parameters of the model are all given in Supplementary Tables 1–7. In particular, the adjustment factors used to scale the model from the left atrial version to the pulmonary vein version of the model are found in Supplementary Table 4.

Note that the model formulation is very similar to the base model from [3]. The only difference is that  $\bar{I}_{\text{NaCa}}$  is decreased by 40%,  $g_{\text{Kr}}$  is decreased by 20% and the calcium buffer concentrations  $B_{\text{tot}}^c$  and  $B_{\text{tot}}^{sl}$  are increased by 40% compared to the version in [3]. In addition, a model for the number of  $I_{\text{CaL}}$  channels on the cell membrane has been added.

### Membrane potential

In the membrane model formulation, the membrane potential is governed by

$$\frac{dv}{dt} = -(I_{\text{Na}} + I_{\text{NaL}} + I_{\text{CaL}} + I_{\text{to}} + I_{\text{Kr}} + I_{\text{Ks}} + I_{\text{K1}} + I_{\text{NaCa}} + I_{\text{NaK}} + I_{\text{pCa}} + I_{\text{bCa}} + I_{\text{bCl}} + I_{\text{bNa}} + I_{\text{f}} + I_{\text{Kur}} + I_{\text{stim}}), \quad (1)$$

where  $I_{\text{Na}}$ ,  $I_{\text{NaL}}$ ,  $I_{\text{CaL}}$ ,  $I_{\text{to}}$ ,  $I_{\text{Kr}}$ ,  $I_{\text{Ks}}$ ,  $I_{\text{K1}}$ ,  $I_{\text{NaCa}}$ ,  $I_{\text{NaK}}$ ,  $I_{\text{pCa}}$ ,  $I_{\text{bCl}}$ ,  $I_{\text{bCa}}$ ,  $I_{\text{bNa}}$ ,  $I_{\text{f}}$ , and  $I_{\text{Kur}}$  are transmembrane currents that will be specified below and  $I_{\text{stim}}$  is an applied stimulus current. Unless otherwise specified, we let  $I_{\text{stim}}$  be given as a constant current of size  $-40$  A/F applied for 1 ms.

### Membrane currents

In general, the currents through the voltage-gated ion channels within the myocyte membrane are given on the form

$$I = go(v - E),$$

where  $g$  is the channel conductance,  $v$  is the membrane potential and  $E$  is the equilibrium potential of the channel. Moreover,  $o$  is the open probability of the channels, which is given on the form  $o = \prod_i z_i$ , where  $z_i$  are gating

variables. These gating variables are either given as an explicit function of the membrane potential or governed by equations of the form

$$z'_i = \frac{1}{\tau_{z_i}}(z_{i,\infty} - z_i). \quad (2)$$

The parameters  $\tau_{z_i}$  and  $z_{i,\infty}$  are specified for each of the gating variables of the model in Supplementary Table 10.

**Fast sodium current ( $I_{\text{Na}}$ )** The formulation of the fast sodium current is based on the model formulation given in [4] and is given by

$$I_{\text{Na}} = g_{\text{Na}} o_{\text{Na}}(v - E_{\text{Na}}), \quad (3)$$

where the open probability is given by

$$o_{\text{Na}} = m^3 j, \quad (4)$$

and  $m$  and  $j$  are gating variables governed by equations of the form (2).

**Late sodium current ( $I_{\text{NaL}}$ )** The formulation of the late sodium current,  $I_{\text{NaL}}$ , is based on [5] and is given by

$$I_{\text{NaL}} = g_{\text{NaL}} o_{\text{NaL}}(v - E_{\text{Na}}), \quad (5)$$

where the open probability is given by

$$o_{\text{NaL}} = m_L h_L, \quad (6)$$

and  $m_L$  and  $h_L$  are gating variables governed by equations of the form (2).

**Transient outward potassium current ( $I_{\text{to}}$ )** The formulation of the transient outward potassium current,  $I_{\text{to}}$ , is based on [6] and is given by

$$I_{\text{to}} = g_{\text{to}} o_{\text{to}}(v - E_{\text{K}}), \quad (7)$$

where the open probability is given by

$$o_{\text{to}} = q_{\text{to}} r_{\text{to}}, \quad (8)$$

and  $q_{\text{to}}$  and  $r_{\text{to}}$  are gating variables governed by equations of the form (2).



**Rapidly activating potassium current ( $I_{Kr}$ )** The rapidly activating potassium current,  $I_{Kr}$ , is formulated as a Markov model, based on [7]. The formulation has been fitted to data of WT and N588K  $I_{Kr}$  currents from [8]. The current is given by

$$I_{Kr} = g_{Kr} \sqrt{\frac{[K^+]_e}{[K^+]_i}} \frac{T - 275 \text{ K}}{35 \text{ K}} o_{Kr} (v - E_K), \quad (9)$$

where  $o_{Kr}$  is modelled by a Markov model of the form

$$c_{Kr,1} \xrightleftharpoons[\beta_{Kr,1}]{\alpha_{Kr,1}} c_{Kr,2} \xrightleftharpoons[\beta_{Kr,2}]{\alpha_{Kr,2}} c_{Kr,3} \xrightleftharpoons[\beta_{Kr,3}]{\alpha_{Kr,3}} o_{Kr} \xrightleftharpoons[\beta_{Kr,4}]{\alpha_{Kr,4}} i_{Kr}. \quad (10)$$

Here, the dynamics of the closed states  $c_{Kr,1}$ ,  $c_{Kr,2}$ , and  $c_{Kr,3}$ , the open state  $o_{Kr}$ , and the inactivated state  $i_{Kr}$  are given by

$$\frac{dc_{Kr,1}}{dt} = \beta_{Kr,1} c_{Kr,2} - \alpha_{Kr,1} c_{Kr,1}, \quad (11)$$

$$\frac{dc_{Kr,2}}{dt} = \alpha_{Kr,1} c_{Kr,1} + \beta_{Kr,2} c_{Kr,3} - (\alpha_{Kr,2} + \beta_{Kr,1}) c_{Kr,2}, \quad (12)$$

$$\frac{dc_{Kr,3}}{dt} = \alpha_{Kr,2} c_{Kr,2} + \beta_{Kr,3} o_{Kr} - (\alpha_{Kr,3} + \beta_{Kr,2}) c_{Kr,3}, \quad (13)$$

$$\frac{do_{Kr}}{dt} = \alpha_{Kr,3} c_{Kr,3} + \beta_{Kr,4} i_{Kr} - (\alpha_{Kr,4} + \beta_{Kr,3}) o_{Kr}, \quad (14)$$

$$\frac{di_{Kr}}{dt} = \alpha_{Kr,4} o_{Kr} - \beta_{Kr,4} i_{Kr}, \quad (15)$$

where the transition rates are given by provided in Supplementary Table 8.

**Slowly activating potassium current ( $I_{Ks}$ )** The formulation of the slowly activating potassium current,  $I_{Ks}$ , is based on [4] and is given by

$$I_{Ks} = g_{Ks} o_{Ks} (v - E_{Ks}), \quad (16)$$

where

$$o_{Ks} = x_{Ks}^2, \quad (17)$$

and the dynamics of  $x_{Ks}$  is governed by an equation of the form (2).

**Inward rectifier potassium current ( $I_{K1}$ )** The formulation of the inward rectifier potassium current,  $I_{K1}$ , is based on [9, 10], and is given by

$$I_{K1} = g_{K1} \sqrt{\frac{[K^+]_e}{[K^+]_i}} \left( \frac{0.059764(v - E_K + 0.582854)}{0.754829 + e^{0.0767156(v - E_K + 0.582854)}} - 0.0114237 \right).$$

**Ultrarapid delayed rectifier potassium current ( $I_{\text{Kur}}$ )** The formulation of the ultrarapid delayed rectifier potassium current,  $I_{\text{Kur}}$ , is based on [11, 12] and is given by

$$I_{\text{Kur}} = g_{\text{Kur}} f_{\text{Kur}} o_{\text{Kur}} (v - E_{\text{K}}), \quad (18)$$

where  $f_{\text{Kur}}$  is given by

$$f_{\text{Kur}} = 0.005 + \frac{0.05}{1 + e^{-\frac{v-15}{13}}} \quad (19)$$

and

$$o_{\text{Kur}} = x_{\text{Kur}1}^3 \cdot x_{\text{Kur}2}. \quad (20)$$

The dynamics of  $x_{\text{Kur}1}$  and  $x_{\text{Kur}2}$  are governed by equations of the form (2).

**Hyperpolarization activated funny current ( $I_{\text{f}}$ )** The formulation for the hyperpolarization activated funny current,  $I_{\text{f}}$ , is based on [6] and is given by

$$I_{\text{f}} = g_{\text{f}} o_{\text{f}} (v - E_{\text{f}}), \quad (21)$$

where

$$o_{\text{f}} = x_{\text{f}}, \quad (22)$$

and the dynamics of  $x_{\text{f}}$  is governed by an equation of the form (2).

**L-type  $\text{Ca}^{2+}$  current ( $I_{\text{CaL}}$ )** The formulation for the L-type  $\text{Ca}^{2+}$  current,  $I_{\text{CaL}}$ , is based on the formulation in [4] and is given by

$$I_{\text{CaL}} = n g_{\text{CaL}} (Q_{10}^{\text{CaL}})^{Q_p} o_{\text{CaL}} \frac{(2F)^2 v 0.341 c_d e^{\frac{2Fv}{RT}} - 0.341 c_e}{RT (e^{\frac{2Fv}{RT}} - 1)}, \quad (23)$$

where

$$o_{\text{CaL}} = df(1 - f_{\text{Ca}}), \quad (24)$$

and the dynamics of  $d$ ,  $f$  and  $f_{\text{Ca}}$  are governed by equations of the form (2). Note that  $n$  is governed by (54) and represents the relative number of  $I_{\text{CaL}}$  channels.

**Time-independent background currents ( $I_{\text{bCa}}$ ,  $I_{\text{bBa}}$ ,  $I_{\text{bCl}}$ )** The formulation of the background currents,  $I_{\text{bCa}}$ ,  $I_{\text{bNa}}$  and  $I_{\text{bCl}}$ , are based on [4] and are given by

$$I_{\text{bCa}} = g_{\text{bCa}} (v - E_{\text{Ca}}), \quad (25)$$

$$I_{\text{bNa}} = g_{\text{bNa}} (v - E_{\text{Na}}), \quad (26)$$

$$I_{\text{bCl}} = g_{\text{bCl}} (v - E_{\text{Cl}}). \quad (27)$$

**Sodium-calcium exchanger current ( $I_{\text{NaCa}}$ )** The formulation of the  $\text{Na}^+$ - $\text{Ca}^{2+}$  exchanger current,  $I_{\text{NaCa}}$ , is based on [4] and is given by

$$I_{\text{NaCa}} = \bar{I}_{\text{NaCa}} (Q_{10}^{\text{NaCa}})^{Q_p} \frac{e^{\frac{\nu Fv}{RT}} [\text{Na}^+]_i^3 c_e - e^{\frac{(\nu-1)Fv}{RT}} [\text{Na}^+]_e^3 c_{sl}}{s_{\text{NaCa}} \left( 1 + \left( \frac{K_{\text{act}}}{c_{sl}} \right)^2 \right) \left( 1 + k_{\text{sat}} e^{\frac{(\nu-1)Fv}{RT}} \right)}, \quad (28)$$

where

$$s_{\text{NaCa}} = K_{\text{Ca},i} [\text{Na}^+]_e^3 \left( 1 + \left( \frac{[\text{Na}^+]_i}{K_{\text{Na},i}} \right)^3 \right) + K_{\text{Na},e}^3 c_{sl} \left( 1 + \frac{c_{sl}}{K_{\text{Ca},i}} \right) + K_{\text{Ca},e} [\text{Na}^+]_i^3 + [\text{Na}^+]_i^3 c_e + [\text{Na}^+]_e^3 c_{sl}.$$

**Sarcolemmal  $\text{Ca}^{2+}$  pump current ( $I_{\text{pCa}}$ )** The formulation of the current through the sarcolemmal  $\text{Ca}^{2+}$  pump,  $I_{\text{pCa}}$ , is based on [4] and is given by

$$I_{\text{pCa}} = \bar{I}_{\text{pCa}} \left( Q_{10}^{\text{pCa}} \right)^{Q_p} \frac{c_{sl}^2}{K_{\text{pCa}}^2 + c_{sl}^2}. \quad (29)$$

**Sodium-potassium pump current ( $I_{\text{NaK}}$ )** The current through the  $\text{Na}^+$ - $\text{K}^+$  pump,  $I_{\text{NaK}}$ , is based on [4] and is given by

$$I_{\text{NaK}} = \bar{I}_{\text{NaK}} (Q_{10}^{\text{NaK}})^{Q_p} \frac{f_{\text{NaK}}}{1 + \left( \frac{K_{\text{Na},i}^{\text{NaK}}}{[\text{Na}^+]_i} \right)^4} \frac{[\text{K}^+]_e}{[\text{K}^+]_e + K_{\text{K},e}}, \quad (30)$$

where

$$f_{\text{NaK}} = \frac{1}{1 + 0.12e^{-0.1\frac{Fv}{RT}}} + \frac{0.037}{7} \left( e^{\frac{[\text{Na}^+]_e}{67}} - 1 \right) e^{-\frac{Fv}{RT}}. \quad (31)$$

## Intracellular $[\text{Ca}^{2+}]$ dynamics

The  $\text{Ca}^{2+}$  dynamics are governed by

$$\frac{dc_d}{dt} = \frac{1}{V_d}(J_{\text{CaL}} - J_d^b - J_d^c), \quad \frac{db_d}{dt} = \frac{1}{V_d}J_d^b, \quad (32)$$

$$\frac{dc_{sl}}{dt} = \frac{1}{V_{sl}}(J_e^{sl} - J_{sl}^c - J_{sl}^b + J_s^{sl}), \quad \frac{db_{sl}}{dt} = \frac{1}{V_{sl}}J_{sl}^b, \quad (33)$$

$$\frac{dc_c}{dt} = \frac{1}{V_c}(J_{sl}^c + J_d^c - J_c^n - J_c^b), \quad \frac{db_c}{dt} = \frac{1}{V_c}J_c^b, \quad (34)$$

$$\frac{dc_s}{dt} = \frac{1}{V_s}(J_n^s - J_s^{sl} - J_s^b), \quad \frac{db_s}{dt} = \frac{1}{V_s}J_s^b, \quad (35)$$

$$\frac{dc_n}{dt} = \frac{1}{V_n}(J_c^n - J_n^s). \quad (36)$$

Here,  $c_d$  is the concentration of free  $\text{Ca}^{2+}$  in the dyad,  $b_d$  is the concentration of  $\text{Ca}^{2+}$  bound to a buffer in the dyad,  $c_{sl}$  is the concentration of free  $\text{Ca}^{2+}$  in the sub-sarcolemmal (SL) compartment,  $b_{sl}$  is the concentration of  $\text{Ca}^{2+}$  bound to a buffer in the SL compartment,  $c_c$  is the concentration of free  $\text{Ca}^{2+}$  in the bulk cytosol,  $b_c$  is the concentration of  $\text{Ca}^{2+}$  bound to a buffer in the bulk cytosol,  $c_s$  is the concentration of free  $\text{Ca}^{2+}$  in the junctional sarcoplasmic reticulum (jSR),  $b_s$  is the concentration of  $\text{Ca}^{2+}$  bound to a buffer in the jSR, and  $c_n$  is the concentration of free  $\text{Ca}^{2+}$  in the network sarcoplasmic reticulum (nSR). The expressions for the fluxes are specified below.

## $\text{Ca}^{2+}$ fluxes

**Flux through the SERCA pumps** The flux from the bulk cytosol to the nSR through the SERCA pumps is based on [4] and given by

$$J_c^n = \bar{J}_{\text{SERCA}} (Q_{10}^{\text{SERCA}})^{Q_p} \frac{\left(\frac{c_c}{K_c}\right)^2 - \left(\frac{c_n}{K_n}\right)^2}{1 + \left(\frac{c_c}{K_c}\right)^2 + \left(\frac{c_n}{K_n}\right)^2}. \quad (37)$$

**Flux through the RyRs** The flux from the jSR to the SL compartment is given by

$$J_s^{sl} = J_{\text{RyR}} + J_{\text{leak}}, \quad (38)$$

where  $J_{\text{RyR}}$  is the flux through the active RyR channels and  $J_{\text{leak}}$  is the flux through passive RyR channels that are always open, given by

$$J_{\text{RyR}} = p \cdot r \cdot \alpha_{\text{RyR}}(c_s - c_{sl}), \quad (39)$$

$$J_{\text{leak}} = \gamma_{\text{RyR}} \cdot \alpha_{\text{RyR}}(c_s - c_{sl}), \quad (40)$$

respectively. Here,  $p$  represents the open probability of the active RyR channels and is given by

$$p = \frac{c_d^3}{c_d^3 + \kappa_{\text{RyR}}^3}. \quad (41)$$

Furthermore,  $r$  is the fraction of RyR channels that are not inactivated and is governed by the equation

$$\frac{dr}{dt} = -\frac{J_{\text{RyR}}}{\beta_{\text{RyR}}} + \frac{\eta_{\text{RyR}}}{p}(1 - r). \quad (42)$$

**Passive diffusion fluxes between compartments** The passive diffusion fluxes between intracellular compartments are given by

$$J_d^c = \alpha_d^c(c_d - c_c), \quad (43)$$

$$J_{sl}^c = \alpha_{sl}^c(c_{sl} - c_c), \quad (44)$$

$$J_n^s = \alpha_n^s(c_n - c_s). \quad (45)$$

**Buffer fluxes** The fluxes of free  $\text{Ca}^{2+}$  binding to a  $\text{Ca}^{2+}$  buffer are given by

$$J_d^b = V_d(k_{\text{on}}^d c_d (B_{\text{tot}}^d - b_d) - k_{\text{off}}^d b_d), \quad (46)$$

$$J_{sl}^b = V_{sl}(k_{\text{on}}^{sl} c_{sl} (B_{\text{tot}}^{sl} - b_{sl}) - k_{\text{off}}^{sl} b_{sl}), \quad (47)$$

$$J_c^b = V_c(k_{\text{on}}^c c_c (B_{\text{tot}}^c - b_c) - k_{\text{off}}^c b_c), \quad (48)$$

$$J_s^b = V_s(k_{\text{on}}^s c_s (B_{\text{tot}}^s - b_s) - k_{\text{off}}^s b_s). \quad (49)$$

**Membrane fluxes** The membrane  $\text{Ca}^{2+}$  fluxes,  $J_{\text{CaL}}$ ,  $J_{\text{bCa}}$ ,  $J_{\text{pCa}}$ , and  $J_{\text{NaCa}}$ , are given by

$$J_{\text{CaL}} = -\frac{\chi C_m}{2F} I_{\text{CaL}}, \quad J_{\text{pCa}} = -\frac{\chi C_m}{2F} I_{\text{pCa}}, \quad (50)$$

$$J_{\text{bCa}} = -\frac{\chi C_m}{2F} I_{\text{bCa}}, \quad J_{\text{NaCa}} = \frac{\chi C_m}{F} I_{\text{NaCa}}, \quad (51)$$

where  $I_{\text{CaL}}$ ,  $I_{\text{bCa}}$ ,  $I_{\text{pCa}}$ , and  $I_{\text{NaCa}}$  are defined by the expressions given above. Furthermore,

$$J_e^{sl} = J_{\text{NaCa}} + J_{\text{pCa}} + J_{\text{bCa}}. \quad (52)$$

## Intracellular Na<sup>+</sup> dynamics

The intracellular Na<sup>+</sup> concentration is governed by

$$\frac{d[\text{Na}_i]}{dt} = -\frac{\chi C_m}{F} (I_{\text{Na}} + I_{\text{NaL}} + I_{\text{bNa}} + 3I_{\text{NaK}} + 3I_{\text{NaCa}} + 0.3293I_f), \quad (53)$$

where the currents  $I_{\text{Na}}$ ,  $I_{\text{NaL}}$ ,  $I_{\text{bNa}}$ ,  $I_{\text{NaK}}$ ,  $I_{\text{NaCa}}$ , and  $I_f$  are specified above.

## Protein regulation

The scaling factor  $n$  for the number of L-type calcium channels on the cell membrane is modeled by

$$\tau_n \frac{dn}{dt} = (c^* - c)H(c, n), \quad (54)$$

$$H(c, n) = h(n, n_-, \varepsilon_n)h(c, c^*, \varepsilon_c) + h(n_+, n, \varepsilon_n)h(c^*, c, \varepsilon_c), \quad (55)$$

$$h(a, b, \varepsilon) = \frac{1}{2} \left( 1 + \tanh \left( \frac{a - b}{\varepsilon} \right) \right). \quad (56)$$

The function  $H(c, n)$  is illustrated in Supplementary Figure 6.

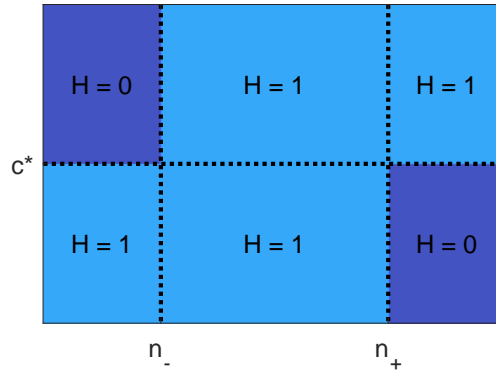

**Supplementary Figure 6: Illustration of the function  $H(c, n)$ .**

## Nernst equilibrium potentials

The Nernst equilibrium potentials for the ion channels are defined as

$$E_{\text{Na}} = \frac{RT}{F} \log \left( \frac{[\text{Na}^+]_e}{[\text{Na}^+]_i} \right), \quad (57)$$

$$E_{\text{Ca}} = \frac{RT}{2F} \log \left( \frac{[\text{Ca}^{2+}]_e}{c_{sl}} \right), \quad (58)$$

$$E_{\text{K}} = \frac{RT}{F} \log \left( \frac{[\text{K}^+]_e}{[\text{K}^+]_i} \right), \quad (59)$$

$$E_{\text{Ks}} = \frac{RT}{F} \log \left( \frac{[\text{K}^+]_e + 0.018[\text{Na}^+]_e}{[\text{K}^+]_i + 0.018[\text{Na}^+]_i} \right), \quad (60)$$

$$E_{\text{Cl}} = \frac{RT}{F} \log \left( \frac{[\text{Cl}^+]_e}{[\text{Cl}^+]_i} \right), \quad (61)$$

$$E_f = -17 \text{ mV}, \quad (62)$$

for the parameter values given in Supplementary Table 2.

## Baseline parameter values

| Parameter | Description                            | Value                  |
|-----------|----------------------------------------|------------------------|
| $V_d$     | Volume fraction of the dyadic subspace | 0.001                  |
| $V_{sl}$  | Volume fraction of the SL compartment  | 0.028                  |
| $V_c$     | Volume fraction of the bulk cytosol    | 0.917                  |
| $V_s$     | Volume fraction of the jSR             | 0.004                  |
| $V_n$     | Volume fraction of the nSR             | 0.05                   |
| $\chi$    | Cell surface to volume ratio           | $0.6 \mu\text{m}^{-1}$ |

**Supplementary Table 1:** Default geometry parameters of the membrane model.

| Parameter            | Description                                    | Value                    |
|----------------------|------------------------------------------------|--------------------------|
| $C_m$                | Specific membrane capacitance                  | 0.01 pF/ $\mu\text{m}^2$ |
| $F$                  | Faraday's constant                             | 96.485 C/mmol            |
| $R$                  | Universal gas constant                         | 8.314 J/(mol·K)          |
| $T$                  | Temperature                                    | 310 K                    |
| $[\text{Ca}^{2+}]_e$ | Extracellular $\text{Ca}^{2+}$ concentration   | 1.8 mM                   |
| $[\text{Na}^+]_e$    | Extracellular sodium concentration             | 140 mM                   |
| $[\text{K}^+]_e$     | Extracellular potassium concentration          | 5.4 mM                   |
| $[\text{K}^+]_e^b$   | Baseline extracellular potassium concentration | 5.4 mM                   |
| $[\text{K}^+]_i$     | Intracellular potassium concentration          | 120 mM                   |
| $[\text{Cl}^-]_e$    | Extracellular chloride concentration           | 150 mM                   |
| $[\text{Cl}^-]_i$    | Intracellular chloride concentration           | 15 mM                    |

**Supplementary Table 2:** Physical constants and ionic concentrations of the membrane model.

| Parameter              | Value                          | Parameter                | Value                           |
|------------------------|--------------------------------|--------------------------|---------------------------------|
| $g_{\text{Na}}$        | 7.056 mS/ $\mu\text{F}$        | $\bar{I}_{\text{NaCa}}$  | 2.22 $\mu\text{A}/\mu\text{F}$  |
| $g_{\text{NaL}}$       | 0.021 mS/ $\mu\text{F}$        | $\bar{I}_{\text{pCa}}$   | 0.068 $\mu\text{A}/\mu\text{F}$ |
| $g_{\text{to}}$        | 0.55 mS/ $\mu\text{F}$         | $\bar{J}_{\text{SERCA}}$ | 0.00024 mM/ms                   |
| $g_{\text{Kr}}$        | 1.2 mS/ $\mu\text{F}$          | $\alpha_{\text{RyR}}$    | 0.0075 $\text{ms}^{-1}$         |
| $g_{\text{Ks}}$        | 0.21 mS/ $\mu\text{F}$         | $\beta_{\text{RyR}}$     | 0.038 mM                        |
| $g_{\text{K1}}$        | 2.62 mS/ $\mu\text{F}$         | $\alpha_d^c$             | 0.0034 $\text{ms}^{-1}$         |
| $g_{\text{f}}$         | 0.0001 mS/ $\mu\text{F}$       | $\alpha_{sl}^c$          | 0.15 $\text{ms}^{-1}$           |
| $g_{\text{bCl}}$       | 0.0114 mS/ $\mu\text{F}$       | $\alpha_n^s$             | 0.012 $\text{ms}^{-1}$          |
| $g_{\text{CaL}}$       | 0.049 nL/( $\mu\text{F}$ ms)   | $B_{\text{tot}}^c$       | 0.07 mM                         |
| $g_{\text{bCa}}$       | 0.000832 mS/ $\mu\text{F}$     | $B_{\text{tot}}^d$       | 1.2 mM                          |
| $g_{\text{bNa}}$       | 0.00185 mS/ $\mu\text{F}$      | $B_{\text{tot}}^{sl}$    | 0.9 mM                          |
| $g_{\text{Kur}}$       | 2.475 mS/ $\mu\text{F}$        | $B_{\text{tot}}^s$       | 27 mM                           |
| $\bar{I}_{\text{NaK}}$ | 2.76 $\mu\text{A}/\mu\text{F}$ |                          |                                 |

**Supplementary Table 3:** Conductances and similar cell-specific parameter values in the membrane model formulation. Note that the parameter values of this table define the human left atrial version of the membrane model. For the human pulmonary vein version, the adjustment factors of Supplementary Table 4 are applied.



| Parameter | PV scaling factor |
|-----------|-------------------|
| $g_{K1}$  | 0.58              |
| $g_{Kr}$  | 1.5               |
| $g_{Ks}$  | 1.6               |
| $g_{to}$  | 0.75              |
| $g_{CaL}$ | 0.7               |

**Supplementary Table 4:** Adjustment factors for the pulmonary vein (PV) version of the membrane model, based on [13].

| Parameter      | Flux       | Value                    |
|----------------|------------|--------------------------|
| $K_c$          | $J_c^n$    | 0.00025 mM               |
| $K_n$          | $J_c^n$    | 1.7 mM                   |
| $\gamma_{RyR}$ | $J_s^{sl}$ | 0.001                    |
| $\kappa_{RyR}$ | $J_{RyR}$  | 0.015 mM                 |
| $\eta_{RyR}$   | $J_s^{sl}$ | 0.00001 ms <sup>-1</sup> |

**Supplementary Table 5:** Parameters for the intracellular Ca<sup>2+</sup> fluxes of the membrane model.

| Parameter        | Current    | Value                                         |
|------------------|------------|-----------------------------------------------|
| $k_{sat}$        | $I_{NaCa}$ | 0.3                                           |
| $\nu$            | $I_{NaCa}$ | 0.3                                           |
| $K_{act}$        | $I_{NaCa}$ | 0.00015 mM                                    |
| $K_{Ca,i}$       | $I_{NaCa}$ | 0.0036 mM                                     |
| $K_{Ca,e}$       | $I_{NaCa}$ | 1.3 mM                                        |
| $K_{Na,i}$       | $I_{NaCa}$ | 12.3 mM                                       |
| $K_{Na,e}$       | $I_{NaCa}$ | 87.5 mM                                       |
| $K_{Na,i}^{NaK}$ | $I_{NaK}$  | $(11 \text{ mM}) \cdot (Q_{10}^{KNaK})^{Q_p}$ |
| $K_{K,e}$        | $I_{NaK}$  | 1.5 mM                                        |
| $K_{pCa}$        | $I_{pCa}$  | 0.0005 mM                                     |

**Supplementary Table 6:** Additional parameters for the membrane currents of the membrane model.

| Parameter             | Compartment          | Value                               |
|-----------------------|----------------------|-------------------------------------|
| $k_{\text{on}}^c$     | Bulk cytosol         | $40 \text{ ms}^{-1}\text{mM}^{-1}$  |
| $k_{\text{off}}^c$    | Bulk cytosol         | $0.03 \text{ ms}^{-1}$              |
| $k_{\text{on}}^d$     | Dyad                 | $100 \text{ ms}^{-1}\text{mM}^{-1}$ |
| $k_{\text{off}}^d$    | Dyad                 | $1 \text{ ms}^{-1}$                 |
| $k_{\text{on}}^{sl}$  | Subsarcolemmal space | $100 \text{ ms}^{-1}\text{mM}^{-1}$ |
| $k_{\text{off}}^{sl}$ | Subsarcolemmal space | $0.15 \text{ ms}^{-1}$              |
| $k_{\text{on}}^s$     | Junctional SR        | $100 \text{ ms}^{-1}\text{mM}^{-1}$ |
| $k_{\text{off}}^s$    | Junctional SR        | $65 \text{ ms}^{-1}$                |

**Supplementary Table 7:** Transition rates for the  $\text{Ca}^{2+}$  buffers of the membrane model.

|                        |                                                                                                            |
|------------------------|------------------------------------------------------------------------------------------------------------|
| $\alpha_{\text{Kr},1}$ | $0.4 \cdot T_* \cdot e^{24.335+T_*^{-1}(0.0112v-25.914)}$                                                  |
| $\beta_{\text{Kr},1}$  | $T_* \cdot e^{13.688+T_*^{-1}(-0.0603v-15.707)}$                                                           |
| $\alpha_{\text{Kr},2}$ | $0.4 \cdot T_* \cdot e^{22.746+T_*^{-1}(-25.914)}$                                                         |
| $\beta_{\text{Kr},2}$  | $T_* \cdot e^{13.193+T_*^{-1}(-15.707)}$                                                                   |
| $\alpha_{\text{Kr},3}$ | $0.4 \cdot T_* \cdot e^{22.098+T_*^{-1}(0.0365v-25.914)}$                                                  |
| $\beta_{\text{Kr},3}$  | $T_* \cdot e^{7.313+T_*^{-1}(-0.0399v-15.707)}$                                                            |
| $\alpha_{\text{Kr},4}$ | $T_* \cdot \left( \frac{[\text{K}^+]_e}{[\text{K}^+]_i} \right)^{0.4} e^{30.016+T_*^{-1}(0.0223v-30.888)}$ |
| $\beta_{\text{Kr},4}$  | $T_* \cdot e^{30.061+T_*^{-1}(-0.0312v-33.243)}$                                                           |

**Supplementary Table 8:** Transition rates for the  $I_{\text{Kr}}$  Markov model. Here,  $T_* = \frac{T}{310 \text{ K}}$ , where  $T$  is the temperature.

| Parameter       | Value                           | Parameter       | Value                           |
|-----------------|---------------------------------|-----------------|---------------------------------|
| $n_-$           | 0.28                            | $n_+$           | 3                               |
| $\varepsilon_n$ | 0.01                            | $\varepsilon_c$ | $10^{-7} \text{ mM}$            |
| $c^*$ (LA)      | $2.22 \cdot 10^{-4} \text{ mM}$ | $c^*$ (PV)      | $1.79 \cdot 10^{-4} \text{ mM}$ |
| $\tau_n$        | 30,000 mMms                     |                 |                                 |

**Supplementary Table 9:** Parameters for the regulation of the number of L-type calcium channels in the cell membrane.

| Current          | Gate              | $z_\infty$                                                   | $\alpha_z$                                                                                                                                                                         | $\beta_z$                                                                                                                                                      | $\tau_z$                                                                                 |
|------------------|-------------------|--------------------------------------------------------------|------------------------------------------------------------------------------------------------------------------------------------------------------------------------------------|----------------------------------------------------------------------------------------------------------------------------------------------------------------|------------------------------------------------------------------------------------------|
| $I_{\text{Na}}$  | $m$               | $\frac{1}{(1 + e^{-(v-57)/9})^2}$                            | $0.13e^{-(v+46)/16}$                                                                                                                                                               | $0.06e^{-((v-5)/51)^2}$                                                                                                                                        | $\frac{\alpha_m + \beta_m}{(Q_{10}^{\text{Na}})Q_p}$                                     |
|                  | $j$               | $\frac{1}{(1 + e^{(v+72)/7})^2}$                             | $\begin{cases} 0, & \text{if } v \geq -40 \\ \frac{-2.5 \cdot 10^4 e^{0.2v}}{-7 \cdot 10^{-6} e^{-0.04v}} (v + 38) \\ \frac{1}{1 + e^{0.3(v+79)}}, & \text{otherwise} \end{cases}$ | $\begin{cases} \frac{0.6e^{0.06v}}{1 + e^{-0.1(v+32)}}, & \text{if } v \geq -40 \\ \frac{0.02e^{-0.01v}}{1 + e^{-0.14(v+40)}}, & \text{otherwise} \end{cases}$ | $\frac{1}{(\alpha_j + \beta_j)(Q_{10}^{\text{Na}})Q_p}$                                  |
| $I_{\text{NaL}}$ | $m_L$             | $\frac{1}{1 + e^{-(v+43)/5}}$                                | $\frac{1}{6.8e^{(v+12)/35}}$                                                                                                                                                       | $8.6e^{-(v+77)/6}$                                                                                                                                             | $\frac{\alpha_m + \beta_m}{(Q_{10}^{\text{NaL}})Q_p}$                                    |
|                  | $h_L$             | $\frac{1}{1 + e^{(v+88)/7.5}}$                               |                                                                                                                                                                                    |                                                                                                                                                                | $\frac{200 \text{ ms}}{(Q_{10}^{\text{NaL}})Q_p}$                                        |
| $I_{\text{CaL}}$ | $d$               | $\frac{1}{1 + e^{-(v+20)/6}}$                                | $\frac{1 - e^{-\frac{v+5}{6}}}{0.035(v + 5)}$                                                                                                                                      |                                                                                                                                                                | $\alpha_d d_\infty$                                                                      |
|                  | $f$               | $\frac{1}{1 + e^{(v+35)/9}} + \frac{0.6}{1 + e^{(50-v)/20}}$ | $\frac{1}{0.02e^{-(0.034(v+14.5)^2)} + 0.02}$                                                                                                                                      |                                                                                                                                                                | $\alpha_f$                                                                               |
|                  | $f_{\text{Ca}}$   | $\frac{1.7c_d}{1.7c_d + 0.012}$                              | $\frac{1}{1.7c_d^{0.5} + 0.012}$                                                                                                                                                   |                                                                                                                                                                | $\alpha_{\text{Ca}}$                                                                     |
| $I_{\text{to}}$  | $q_{\text{to}}$   | $\frac{1}{1 + e^{(v+53)/13}}$                                | $\frac{39}{0.57e^{-0.08(v+44)} + 0.065e^{0.1(v+46)}}$                                                                                                                              | 6                                                                                                                                                              | $\frac{\alpha_{q_{\text{to}}} + \beta_{q_{\text{to}}}}{(Q_{10}^{\text{to}})Q_p}$         |
|                  | $r_{\text{to}}$   | $\frac{1}{1 + e^{-(v-22.3)/18.75}}$                          | $\frac{14.4}{e^{0.09(v+30.61)} + 0.37e^{-0.12(v+24)}}$                                                                                                                             | 2.75                                                                                                                                                           | $\frac{\alpha_{r_{\text{to}}} + \beta_{r_{\text{to}}}}{(Q_{10}^{\text{to}})Q_p}$         |
| $I_{\text{Ks}}$  | $x_{\text{Ks}}$   | $\frac{1}{1 + e^{-(v+3.8)/14}}$                              | $\frac{990}{1 + e^{-(v+2.4)/14}}$                                                                                                                                                  |                                                                                                                                                                | $\frac{\alpha_{x_{\text{Ks}}}}{(Q_{10}^{\text{Ks}})Q_p}$                                 |
| $I_{\text{Kur}}$ | $x_{\text{Kur1}}$ | $\frac{1}{1 + e^{-(v+30.3)/9.6}}$                            | $\frac{0.65}{e^{-(v+10)/8.5} + e^{-(v-30)/59}}$                                                                                                                                    | $\frac{0.65}{2.5 + e^{(v+82)/17}}$                                                                                                                             | $\frac{1}{(\alpha_{x_{\text{Kur1}}} + \beta_{x_{\text{Kur1}}})(Q_{10}^{\text{Kur}})Q_p}$ |
|                  | $x_{\text{Kur2}}$ | $\frac{1}{1 + e^{(v-99.45)/27.48}}$                          | $\frac{1}{21 + e^{-(v-185)/28}}$                                                                                                                                                   | $e^{(v-158)/16}$                                                                                                                                               | $\frac{1}{(\alpha_{x_{\text{Kur2}}} + \beta_{x_{\text{Kur2}}})(Q_{10}^{\text{Kur}})Q_p}$ |
| $I_f$            | $x_f$             | $\frac{1}{1 + e^{(v+78)/5}}$                                 | $\frac{1900}{1 + e^{(v+15)/10}}$                                                                                                                                                   |                                                                                                                                                                | $\frac{\alpha_{x_f}}{(Q_{10}^f)Q_p}$                                                     |

**Supplementary Table 10:** Specification of the parameters  $z_\infty$  and  $\tau_z$ , for  $z = m, j, m_L, h_L, d, f, f_{\text{Ca}}, q_{\text{to}}, r_{\text{to}}, x_{\text{Ks}}, x_{\text{Kur1}}, x_{\text{Kur2}},$  and  $x_f$  in the equations for the gating variables (2).

## Supplementary References

- [1] Karoline H Jæger and Aslak Tveito. Efficient, cell-based simulations of cardiac electrophysiology; the Kirchhoff Network Model (KNM). *NPJ Systems Biology and Applications*, 9(1):25, 2023.
- [2] Karoline H Jæger and Aslak Tveito. The simplified Kirchhoff network model (SKNM): a cell-based reaction–diffusion model of excitable tissue. *Scientific Reports*, 13:16434, 2023.
- [3] Karoline H Jæger, Andrew G Edwards, Wayne R Giles, and Aslak Tveito. Arrhythmogenic influence of mutations in a myocyte-based computational model of the pulmonary vein sleeve. *Scientific Reports*, 12(1):1–18, 2022.
- [4] Eleonora Grandi, Francesco S Pasqualini, and Donald M Bers. A novel computational model of the human ventricular action potential and Ca transient. *Journal of Molecular and Cellular Cardiology*, 48(1):112–121, 2010.
- [5] Thomas O’Hara, László Virág, András Varró, and Yoram Rudy. Simulation of the undiseased human cardiac ventricular action potential: Model formulation and experimental validation. *PLoS Computational Biology*, 7(5):e1002061, 2011.
- [6] Michelangelo Paci, Jari Hyttinen, Katriina Aalto-Setälä, and Stefano Severi. Computational models of ventricular-and atrial-like human induced pluripotent stem cell derived cardiomyocytes. *Annals of Biomedical Engineering*, 41(11):2334–2348, 2013.
- [7] Martin Fink, Denis Noble, Laszlo Virag, Andras Varro, and Wayne R Giles. Contributions of HERG K<sup>+</sup> current to repolarization of the human ventricular action potential. *Progress in Biophysics and Molecular Biology*, 96(1-3):357–376, 2008.
- [8] Mark J McPate, Rona S Duncan, James T Milnes, Harry J Witchel, and Jules C Hancox. The N588K-HERG K<sup>+</sup> channel mutation in the ‘short QT syndrome’: mechanism of gain-in-function determined at 37 °C. *Biochemical and Biophysical Research Communications*, 334(2):441–449, 2005.
- [9] Makarand Deo, Yanfei Ruan, Sandeep V Pandit, Kushal Shah, Omer Berenfeld, Andrew Blaufox, Marina Cerrone, Sami F Noujaim, Marco

- Denegri, José Jalife, and Silvia G Priori. KCNJ2 mutation in short QT syndrome 3 results in atrial fibrillation and ventricular proarrhythmia. *Proceedings of the National Academy of Sciences*, 110(11):4291–4296, 2013.
- [10] Eleonora Grandi, Sandeep V Pandit, Niels Voigt, Antony J Workman, Dobromir Dobrev, José Jalife, and Donald M Bers. Human atrial action potential and  $\text{Ca}^{2+}$  model: sinus rhythm and chronic atrial fibrillation. *Circulation Research*, 109(9):1055–1066, 2011.
- [11] Marc Courtemanche, Rafael J Ramirez, and Stanley Nattel. Ionic mechanisms underlying human atrial action potential properties: insights from a mathematical model. *American Journal of Physiology-Heart and Circulatory Physiology*, 275(1):H301–H321, 1998.
- [12] Ingrid E Christophersen, Morten S Olesen, Bo Liang, Martin N Andersen, Anders P Larsen, Jonas B Nielsen, Stig Haunsø, Søren-Peter Olesen, Arnljot Tveit, Jesper H Svendsen, and Nicole Schmitt. Genetic variation in KCNA5: impact on the atrial-specific potassium current  $I_{\text{Kur}}$  in patients with lone atrial fibrillation. *European Heart Journal*, 34(20):1517–1525, 2013.
- [13] Joachim R Ehrlich, Tae-Joon Cha, Liming Zhang, Denis Chartier, Peter Melnyk, Stefan H Hohnloser, and Stanley Nattel. Cellular electrophysiology of canine pulmonary vein cardiomyocytes: action potential and ionic current properties. *The Journal of Physiology*, 551(3):801–813, 2003.
